# Supplementary material for: Ultrathin and flexible polyimide/Ti3C2TX MXene composite films for electromagnetic interference shielding with harsh environment tolerance
Source: Royal Society of Chemistry journal article supplement (doi:10.1039/d3tc03024e), 2023-11-29
Supplement: d3tc03024e1.pdf [file d3tc03024e1.pdf]

## Supporting Information

### Ultrathin and flexible polyimide/Ti<sub>3</sub>C<sub>2</sub>T<sub>x</sub> MXene composite film for electromagnetic interference shielding with harsh environment tolerance

Binzhe Tan, Dongya Guo, Zhirong Tao, Zhibo Chen, Zhijian Lv, Guozhang Wu\* and Yu Lin\*

*Shanghai Key Laboratory of Advanced Polymeric Materials, School of Materials Science and Engineering, East*

*China University of Science and Technology, Shanghai 200237, China*

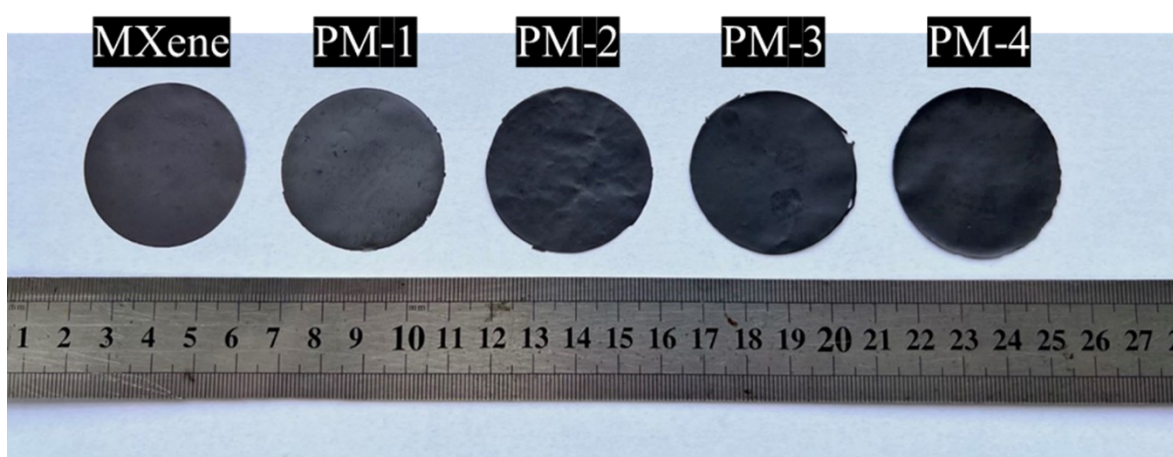

**Fig. S1** Digital images of MXene and PM composite films with different PI contents.

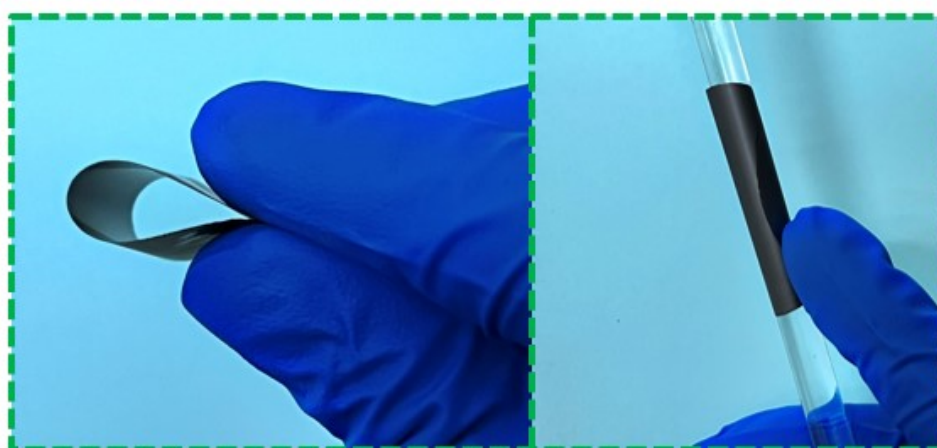

**Fig. S2** Digital images show the PM composite film has excellent flexibility.

\* Corresponding authors. E-mail: [wgz@ecust.edu.cn](mailto:wgz@ecust.edu.cn) (G. Wu), [linyu@ecust.edu.cn](mailto:linyu@ecust.edu.cn) (Y. Lin).

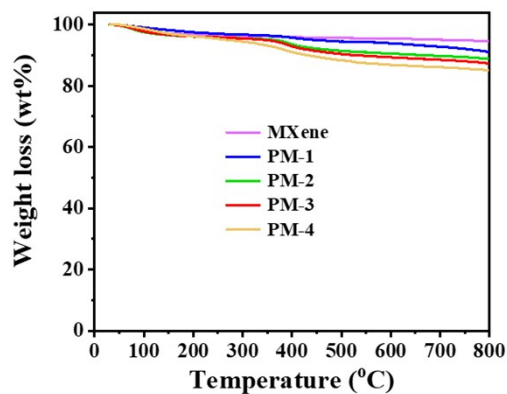

Fig. S3 TGA curves of MXene and PM composite films with different PI contents.

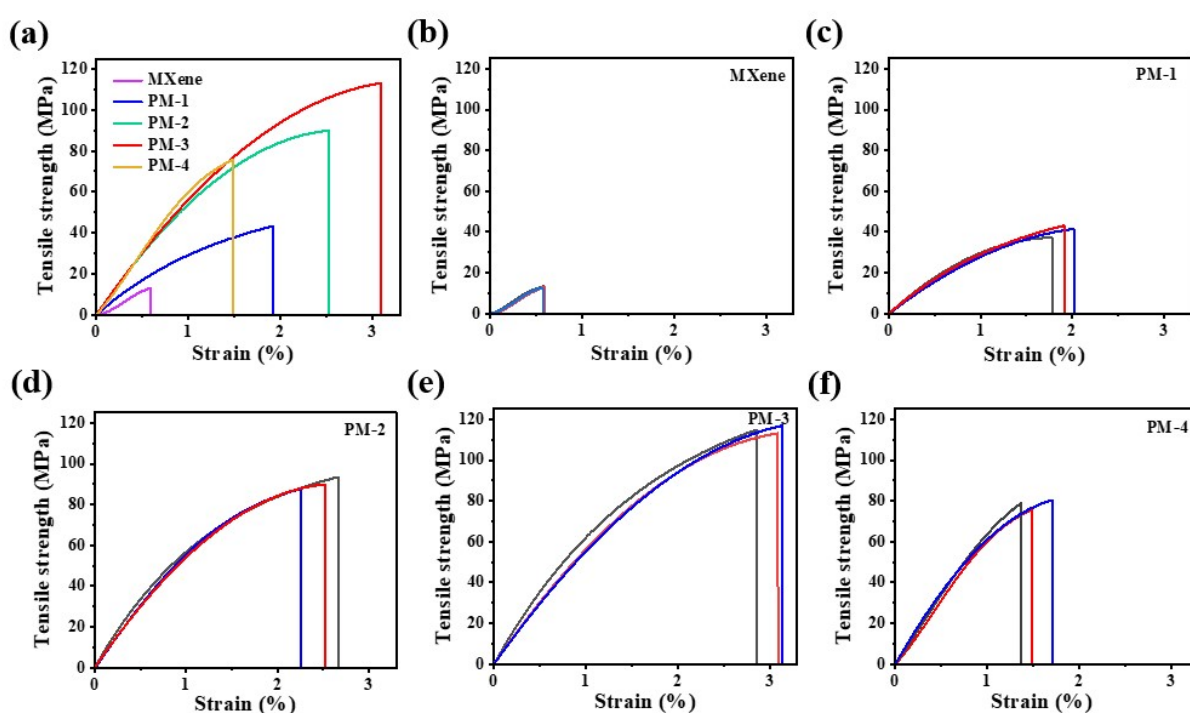

Fig. S4 Tensile stress-strain curves of PM composite films. (a) PM composite films with different PI contents, (b) MXene, (c) PM-1, (d) PM-2, (e) PM-3, and (f) PM-4.

Table S1 Mechanical properties of PM composite films with different PI contents.

| Sample | Tensile strength (MPa) | Young's modulus (GPa) | Strain (%)      |
|--------|------------------------|-----------------------|-----------------|
| MXene  | $12.9 \pm 0.5$         | $2.89 \pm 0.04$       | $0.58 \pm 0.01$ |
| PM-1   | $40.7 \pm 2.5$         | $3.13 \pm 0.09$       | $1.90 \pm 0.10$ |
| PM-2   | $90.4 \pm 2.4$         | $5.27 \pm 0.16$       | $2.48 \pm 0.16$ |
| PM-3   | $114.9 \pm 1.6$        | $6.18 \pm 0.48$       | $3.02 \pm 0.12$ |
| PM-4   | $78.3 \pm 2.0$         | $6.37 \pm 0.34$       | $1.52 \pm 0.14$ |

**Table S2** Comparison of the EMI shielding performance of PM composite films and other materials.

| Type               | Number                                            | Materials                                                    | Thickness (mm) | SE (dB) | SE/d (dB/mm) | SSE/t (dB·cm <sup>2</sup> ·g <sup>-1</sup> ) | Ref. |
|--------------------|---------------------------------------------------|--------------------------------------------------------------|----------------|---------|--------------|----------------------------------------------|------|
| <b>rGO</b>         | 1                                                 | rGO/WPU                                                      | 1              | 34      | 34           | 338                                          | S1   |
|                    | 2                                                 | rGO-Fe <sub>3</sub> O <sub>4</sub> /PVC                      | 1.8            | 13      | 7.2          | 49.5                                         | S2   |
|                    | 3                                                 | rGO-γ-Fe <sub>2</sub> O <sub>3</sub> /PVA                    | 0.36           | 20.3    | 56.4         | 416.7                                        | S3   |
|                    | 4                                                 | rGO/Fe <sub>3</sub> O <sub>4</sub>                           | 0.3            | 24      | 80           | 1033                                         | S4   |
|                    | 5                                                 | rGO/PEDOT                                                    | 0.8            | 70      | 87.5         | 841                                          | S5   |
| <b>CNTs</b>        | 6                                                 | MWCNTs/WPU                                                   | 0.1            | 21.1    | 211          | 5410                                         | S6   |
|                    | 7                                                 | MWCNTs/PC                                                    | 2.1            | 39      | 18.6         | 164                                          | S7   |
|                    | 8                                                 | MWCNTs/ABS                                                   | 1.1            | 50      | 45.5         | 433                                          | S8   |
|                    | 9                                                 | MWCNTs/PS                                                    | 2              | 30      | 15           | 285                                          | S9   |
|                    | 10                                                | CNTs/PC                                                      | 1.85           | 25      | 13.5         | 112.6                                        | S10  |
|                    | 11                                                | CNTs/PP                                                      | 1              | 35      | 35           | 372                                          | S11  |
| <b>MXene-based</b> | 12                                                | Ti <sub>3</sub> C <sub>2</sub> T <sub>X</sub> /PIF           | 0.256          | 49.9    | 194.9        | /                                            | S12  |
|                    | 13                                                | Ti <sub>3</sub> C <sub>2</sub> T <sub>X</sub> /PEDOT:PS<br>S | 0.013          | 21.6    | 1661.5       | 9169.5                                       | S13  |
|                    |                                                   |                                                              | 0.167          | 25      | 149.7        | 1362                                         |      |
|                    | 14                                                | d-Ti <sub>3</sub> C <sub>2</sub> T <sub>X</sub> /CNF         | 0.074          | 26      | 351.4        | 2154                                         | S14  |
|                    |                                                   |                                                              | 0.047          | 24      | 510.6        | 2647                                         |      |
|                    | 15                                                | CNF@Ti <sub>3</sub> C <sub>2</sub> T <sub>X</sub>            | 0.035          | 40      | 1142.8       | 7029                                         | S15  |
|                    | 16                                                | Ti <sub>3</sub> C <sub>2</sub> T <sub>X</sub> /TOCNF         | 0.047          | 32.7    | 695.7        | 4761                                         | S16  |
|                    | 17                                                | Ti <sub>3</sub> C <sub>2</sub> T <sub>X</sub> /ANF           | 0.017          | 28.5    | 1676.5       | 11554.2                                      | S17  |
|                    | 18                                                | Ti <sub>3</sub> C <sub>2</sub> T <sub>X</sub> /CNTs/CNF      | 0.038          | 38.4    | 1010.5       | 8020                                         | S18  |
|                    | 19                                                | Ti <sub>3</sub> C <sub>2</sub> T <sub>X</sub> /PVA           | 0.027          | 44.4    | 1644.4       | 9343                                         | S19  |
| 20                 | Ti <sub>3</sub> C <sub>2</sub> T <sub>X</sub> /SA | 0.014                                                        | 43.9           | 3135.7  | 14830        | S20                                          |      |
| <b>Metal-based</b> | 21                                                | AgNW                                                         | 0.5            | 35      | 70           | 2416                                         | S21  |
|                    | 22                                                | CuNi-CNT                                                     | 1.5            | 54.6    | 36.4         | 1580                                         | S22  |
|                    | 23                                                | CF@NiCo/PI                                                   | 1.08           | 87      | 80.6         | /                                            | S23  |
| <b>This work</b>   | 24                                                | PM-1                                                         | 0.012          | 44      | 3666.7       | 16755                                        |      |
|                    | 25                                                | PM-2                                                         | 0.013          | 41      | 3153.8       | 12566                                        |      |
|                    | 26                                                | PM-3                                                         | 0.015          | 37      | 2467.7       | 10332                                        |      |
|                    | 27                                                | PM-4                                                         | 0.017          | 28      | 1647.1       | 7037                                         |      |

## Supplementary References

- [S1] Hsiao S. T., Ma C. C., Liao W. H., et al. Lightweight and flexible reduced graphene oxide/water-borne polyurethane composites with high electrical conductivity and excellent electromagnetic interference shielding performance [J]. *ACS Applied Materials & Interfaces*. 2014, 6 (13): 10667-10678.
- [S2] Yao K., Gong J., Tian N. N., et al. Flammability properties and electromagnetic interference shielding of PVC/graphene composites containing Fe<sub>3</sub>O<sub>4</sub> nanoparticles [J]. *RSC Advances*. 2015, 5 (40): 31910-31919.
- [S3] Yuan B. H., Bao C. L., Qian X. D., et al. Design of artificial nacre-like hybrid films as shielding to mitigate electromagnetic pollution [J]. *Carbon*. 2014, 75: 178-189.
- [S4] Song W. L., Guan X. T., Fan L. Z., et al. Magnetic and conductive graphene papers toward thin layers of effective electromagnetic shielding [J]. *Journal of Materials Chemistry A*. 2015, 3 (5): 2097-2107.
- [S5] Agnihotri N., Chakrabarti K., De A. Highly efficient electromagnetic interference shielding using graphite nanoplatelet/poly(3,4-ethylenedioxythiophene)-poly(styrenesulfonate) composites with enhanced thermal conductivity [J]. *RSC Advances*. 2015, 5 (54): 43765-43771.
- [S6] Zeng Z. H., Jin H., Chen M. J., et al. Lightweight and Anisotropic Porous MWCNT/WPU Composites for Ultrahigh Performance Electromagnetic Interference Shielding [J]. *Advanced Functional Materials*. 2016, 26 (2): 303-310.
- [S7] Pande S., Chaudhary A., Patel D., et al. Mechanical and electrical properties of multiwall carbon nanotube/polycarbonate composites for electrostatic discharge and electromagnetic interference shielding applications [J]. *RSC Advances*. 2014, 4 (27): 13839-13849.
- [S8] Al-saleh M. H., Saadeh W. H., Sundararaj U. EMI shielding effectiveness of carbon based nanostructured polymeric materials: A comparative study [J]. *Carbon*. 2013, 60: 146-156.
- [S9] Arjmand M., Apperley T., Okoniewski M., et al. Comparative study of electromagnetic interference shielding properties of injection molded versus compression molded multi-walled carbon nanotube/polystyrene composites [J]. *Carbon*. 2012, 50 (14): 5126-5134.
- [S10] Arjmand M., Mahmoodi M., Gelves G. A., et al. Electrical and electromagnetic interference shielding properties of flow-induced oriented carbon nanotubes in polycarbonate [J]. *Carbon*. 2011, 49 (11): 3430-3440.
- [S11] Al-saleh M. H., Sundararaj U. Electromagnetic interference shielding mechanisms of CNT/polymer composites [J]. *Carbon*. 2009, 47 (7): 1738-1746.
- [S12] Sun K., Wang F., Yang W. K., et al. Flexible Conductive Polyimide Fiber/MXene Composite Film for Electromagnetic Interference Shielding and Joule Heating with Excellent Harsh Environment Tolerance [J]. *ACS Applied Materials & Interfaces*. 2021, 13 (42): 50368-50380.
- [S13] Liu R. T., Miao M., Li Y. H., et al. Ultrathin Biomimetic Polymeric Ti<sub>3</sub>C<sub>2</sub>T<sub>x</sub> MXene Composite Films for Electromagnetic Interference Shielding [J]. *ACS Applied Materials & Interfaces*. 2018, 10 (51): 44787-44795.
- [S14] Cao W. T., Chen F. F., Zhu Y. J., et al. Binary Strengthening and Toughening of MXene/Cellulose Nanofiber Composite Paper with Nacre-Inspired Structure and Superior Electromagnetic Interference Shielding Properties [J]. *ACS Nano*. 2018, 12 (5): 4583-4593.

- [S15] Zhou B., Zhang Z., Li Y. L., et al. Flexible, Robust, and Multifunctional Electromagnetic Interference Shielding Film with Alternating Cellulose Nanofiber and MXene Layers [J]. *ACS Applied Materials & Interfaces*. 2020, 12 (4): 4895-4905.
- [S16] Zhan Z. Y., Song Q. C., Zhou Z. H., et al. Ultrastrong and conductive MXene/cellulose nanofiber films enhanced by hierarchical nano-architecture and interfacial interaction for flexible electromagnetic interference shielding [J]. *Journal of Materials Chemistry C*. 2019, 7 (32): 9820-9829.
- [S17] Xie F., Jia F. F., Zhuo L. H., et al. Ultrathin MXene/aramid nanofiber composite paper with excellent mechanical properties for efficient electromagnetic interference shielding [J]. *Nanoscale*. 2019, 11 (48): 23382-23391.
- [S18] Cao W. T., Ma C., Tan S., et al. Ultrathin and Flexible CNTs/MXene/Cellulose Nanofibrils Composite Paper for Electromagnetic Interference Shielding [J]. *Nano-Micro Letters*. 2019, 11 (1): 1-17.
- [S19] Jin X. X., Wang J. F., Dai L. Z., et al. Flame-retardant poly(vinyl alcohol)/MXene multilayered films with outstanding electromagnetic interference shielding and thermal conductive performances [J]. *Chemical Engineering Journal*. 2020, 380: 122475.
- [S20] Zhou Z. H., Liu J. Z., Zhang X. X., et al. Ultrathin MXene/Calcium Alginate Aerogel Film for High-Performance Electromagnetic Interference Shielding [J]. *Advanced Materials Interfaces*. 2019, 6 (6): 1802040.
- [S21] Ma J. J., Wang K., Zhan M. S. A comparative study of structure and electromagnetic interference shielding performance for silver nanostructure hybrid polyimide foams [J]. *RSC Advances*. 2015, 5 (80): 65283-65296.
- [S22] Ji K. J., Zhao H. H., Zhang J., et al. Fabrication and electromagnetic interference shielding performance of open-cell foam of a Cu-Ni alloy integrated with CNTs [J]. *Applied Surface Science*. 2014, 311: 351-356.
- [S23] Li J. W., Zhang X. N., Ding Y. Q., et al. Multifunctional carbon fiber@NiCo/polyimide films with outstanding electromagnetic interference shielding performance [J]. *Chemical Engineering Journal*. 2022, 427: 131937.
